# Supplementary material for: Integrating network toxicology, machine learning, gut microbiome analysis, and structural validation to reveal the molecular mechanism linking PFOA and PFOS exposure to age-related macular degeneration
Source: Research Square preprint supplement (doi:10.21203/rs.3.rs-8563077/v1), 2026-01-29
Supplement: Supplementary file 1 [file 22b4b75649ba7c10507de86b.docx]

**Supplementary Figure 1 Molecular Structure and Toxicity Prediction of Toxins (A. Molecular formula of PFOA/PFOS; B. Prediction of toxicity of PFOA/PFOS). The corresponding relationships of the three labels (green, yellow, red) are as follows: excellent, medium and poor.**

**
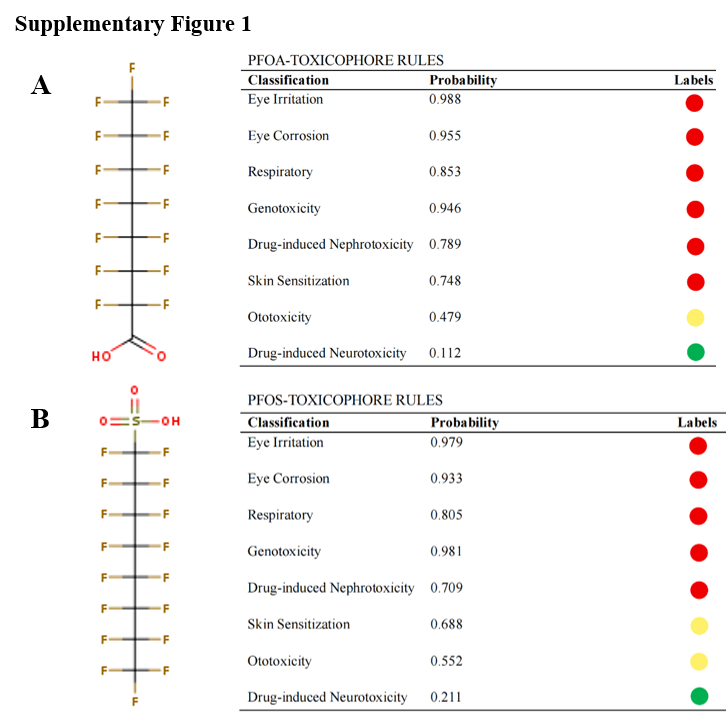
**

**
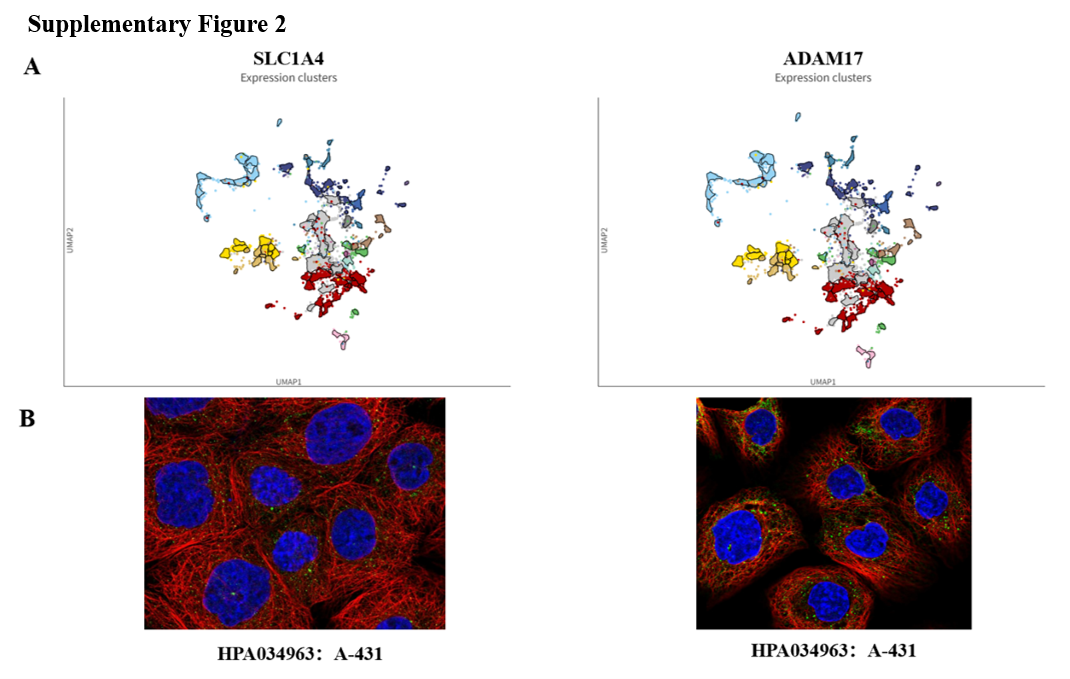
 Supplementary Figure 2 Validation of the hub targets associated with AMD in the HPA database**
